# Supplementary material for: Silver nanowire/nickel hydroxide nanosheet composite for a transparent electrode and all-solid-state supercapacitor
Source: Royal Society of Chemistry journal article supplement (doi:10.1039/c8na00110c), 2018-08-29
Supplement: c8na00110c1.pdf [file c8na00110c1.pdf]

## Supporting Information

### Silver Nanowire/Nickel Hydroxide Nanosheet Composites for Transparent Electrode and All-Solid-State Supercapacitor

Haojin Du,<sup>1</sup> Ying Pan,<sup>1</sup> Xiao Zhang,<sup>1</sup> Fuyang Cao,<sup>1</sup> Tao Wan,<sup>1</sup> Haiwei Du,<sup>2\*</sup> Rakesh Joshi<sup>1</sup> and Dewei Chu<sup>1\*</sup>

<sup>1</sup> *School of Materials Science and Engineering, University of New South Wales, Sydney, NSW 2052, Australia*

<sup>2</sup> *School of Chemistry and Chemical Engineering, Anhui University, Hefei 230601, P. R. China*

\*Corresponding authors: haiwei.du@hotmail.com (H. Du) and d.chu@unsw.edu.au (D. Chu)

Table S1 Comparison of previous studies on Ag NW based composites.

| Composites                          | Application           | Ref.                                                  |
|-------------------------------------|-----------------------|-------------------------------------------------------|
| Ag NW/chitosan                      | Transparent electrode | <i>ACS Appl. Mater. Interfaces</i> , 2017, 9, 4733    |
| Ag NW/polyvinyl alcohol             | Transparent electrode | <i>J. Mater. Chem. C</i> , 2014, 2, 9737              |
| Ag NW/TiO <sub>2</sub>              | Transparent electrode | <i>ACS Appl. Mater. Interfaces</i> , 2018, 10, 2688   |
| Ag NW/ZnO                           | Transparent electrode | <i>ACS Appl. Mater. Interfaces</i> , 2018, 10, 19208  |
| Ag NW/rGO                           | Biosensor             | <i>J. Mater. Chem. C</i> , 2015, 3, 9444              |
| Ag NW/amorphous cobalt layer        | Supercapacitor        | <i>Part. Part. Syst. Charact.</i> , 2017, 34, 1600412 |
| Ag NW/WO <sub>3</sub>               | Supercapacitor        | <i>Chem. Commun.</i> , 2016, 52, 6296                 |
| Ag NW@NiAl LDH                      | Supercapacitor        | <i>Chem. Eng. J.</i> , 2018, 348, 338                 |
| Ag NW/Ni(OH) <sub>2</sub> nanosheet | Transparent electrode | This work                                             |
|                                     | Supercapacitor        |                                                       |

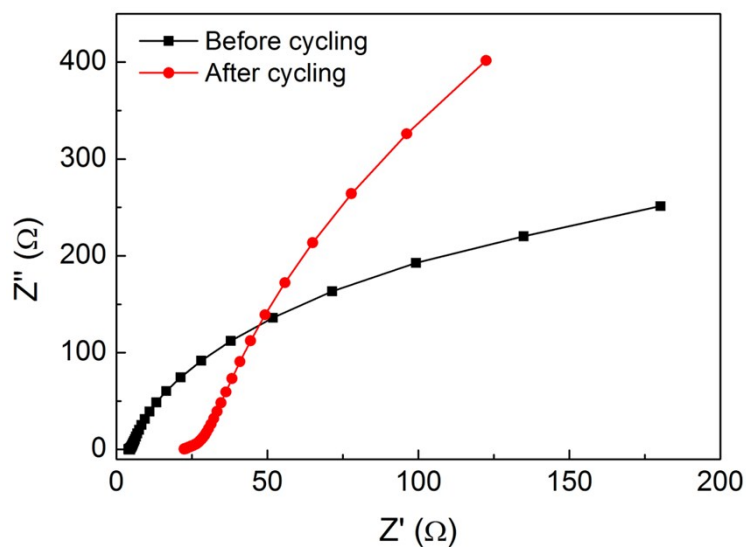

Fig. S1 Electrochemical impedance spectroscopy (EIS) result of Ag NW/Ni(OH)<sub>2</sub> NS electrode before and after cycling tests. Frequency range: 100 kHz to 0.1 Hz. The test was conducted in a three electrode system using Ag/AgCl electrode in saturated potassium chloride (KCl) solution and platinum plate as reference and counter electrode respectively. The electrolyte is 1 M KOH solution.

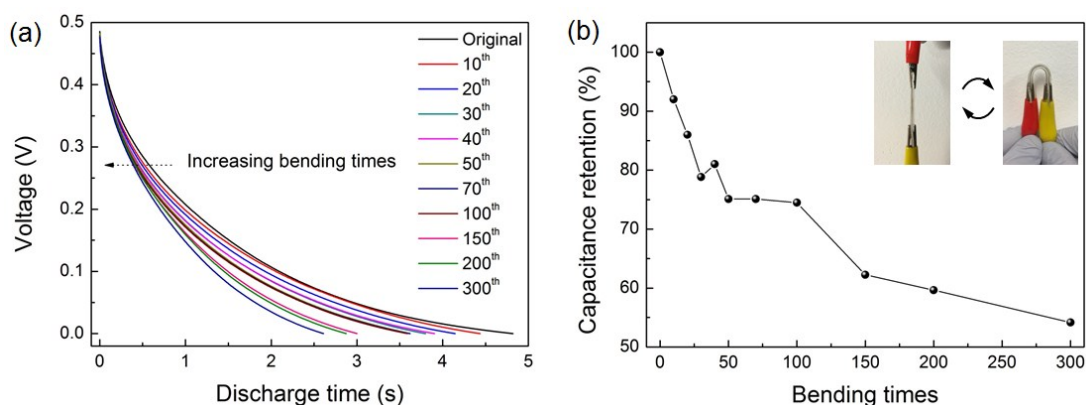

Fig. S2 Discharge curves (a) and capacitance retention (b) with the increasing bending times. Current density: 4 A g<sup>-1</sup>. Inset shows the bending condition and the bending angle is ~180°.
